# Supplementary material for: Regioselective silylation of pyranosides using a boronic acid/Lewis base co-catalyst system
Source: Royal Society of Chemistry journal article supplement (doi:10.1039/c3ob40981c), 2013-01-01

# Regioselective Silylation of Pyranosides Using a Boronic Acid / Lewis Base Co-Catalyst System

Doris Lee and Mark S. Taylor\*

*Department of Chemistry, Lash Miller Laboratories, University of Toronto  
80 St. George St., Toronto ON M5S 3H6 Canada*

## Electronic Supplementary Information

**General:** Reactions were carried out without effort to exclude air or moisture, unless otherwise indicated. Stainless steel syringes were used to transfer air- and moisture-sensitive liquids. Flash chromatography was carried out using neutral silica gel (Silicycle).

**Materials:** HPLC grade acetonitrile was dried and purified using a solvent purification system equipped with columns of activated alumina, under argon (Innovative Technology, Inc.). Distilled water was obtained from an in-house supply. All other reagents and solvents were purchased from Sigma Aldrich, Caledon, Carbosynth or Alfa Aesar, and used without further purification.

**Instrumentation:**  $^1\text{H}$  and  $^{13}\text{C}$  NMR spectra were recorded in  $\text{CDCl}_3$  or  $\text{CD}_3\text{OD}$  solutions using a Bruker Avance III 400 MHz or Varian Mercury 400 MHz spectrometer, referenced to residual protium in the solvent. Spectral features are tabulated in the following order: chemical shift (d, ppm); multiplicity (s-singlet, d-doublet, t-triplet, q-quartet, m-complex multiplet); number of protons; coupling constants ( $J$ , Hz); assignment. Assignments are based on analysis of coupling constants and COSY spectra. High-resolution mass spectra (HRMS) were obtained on a VS 70-250S (double focusing) mass spectrometer at 70 eV. Infrared (IR) spectra were obtained on a Perkin-Elmer Spectrum 100 instrument equipped with a single-reflection diamond / ZnSe ATR accessory, either in the solid state or as neat liquids, as indicated. Spectral features are tabulated as follows: wavenumber ( $\text{cm}^{-1}$ ); intensity (s-strong, m-medium, w-weak, br-broad). Melting points were recorded using a Fisher-Johns melting point apparatus and are uncorrected.

## I. General Experimental Procedures

### General Procedure A: Boronic Acid-Catalyzed Silylation of Carbohydrates in the Presence of a Lewis Base

Arylboronic acid (20 mol%), Lewis base (20 mol%), substrate (0.2 mmol) and *tert*-butyldimethylsilyl chloride (0.4 mmol) were transferred to a 2-dram vial containing a magnetic stir bar. Anhydrous acetonitrile (1 mL) was added to the vial, followed by *N,N*-diisopropylethylamine (0.4 mmol). The resulting mixture was stirred at 60 °C for 16 hours. The mixture was diluted with ethyl acetate (0.5 mL), and then concentrated *in vacuo*. The resulting crude material was purified by silica gel chromatography using ethyl acetate/pentane mixtures.

### General Procedure B: Silylation of Carbohydrates in the Absence of Catalyst

Substrate (0.2 mmol) and *tert*-butyldimethylsilyl chloride (0.4 mmol) were transferred to a 2-dram vial containing a magnetic stir bar. Anhydrous acetonitrile (1 mL) was added to the vial, followed by *N,N*-diisopropylethylamine (0.4 mmol). The resulting mixture was stirred at 60 °C for 16 hours. The mixture was diluted with ethyl acetate (0.5 mL), and then concentrated *in vacuo*. The resulting crude material was purified by silica gel chromatography using ethyl acetate/pentane mixtures.

## II. Effect of Water on the Regioselective Silylation Reaction

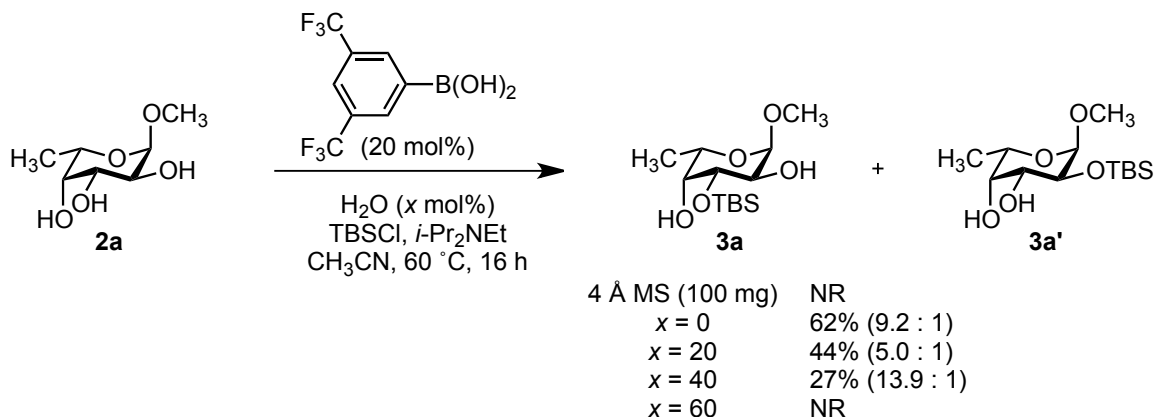

3,5-Bis(trifluoromethyl)phenylboronic acid (20 mol%), methyl  $\alpha$ -L-fucopyranoside (0.2 mmol) and *tert*-butyldimethylsilyl chloride (0.24 mmol) were transferred to a 2-dram vial containing a magnetic stir bar. Anhydrous acetonitrile (1 mL) was added to the vial, followed by *N,N*-diisopropylethylamine (0.4 mmol) and water (*x* mol%). The resulting mixture was stirred at 60 °C for 16 hours. The mixture was diluted with ethyl acetate (0.5 mL), and then concentrated *in vacuo*. The resulting crude material was purified by silica gel chromatography using ethyl acetate/pentane mixtures.

As increasing amounts of water are added, the yield of the reaction decreases such that at 60 mol% of water, no reaction was observed.

### III. Evaluation of Boronic Acids vs. Lewis Bases for Methyl $\beta$ -D-arabinopyranoside

Following general procedure A, a variety of boronic acids and Lewis bases were tested for the regioselective silylation of methyl  $\beta$ -D-arabinopyranoside. From this screen, the optimal catalyst combination was 4-(dimethylamino)phenylboronic acid and pyridine *N*-oxide.

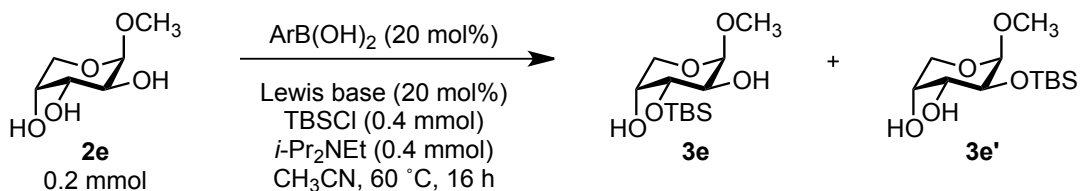

| $\text{ArB(OH)}_2$                                                                  | <i>n</i> -Bu <sub>3</sub> P=O | Ph <sub>3</sub> P=O |  | HMPA              |  |  |  |
|-------------------------------------------------------------------------------------|-------------------------------|---------------------|-----------------------------------------------------------------------------------|-------------------|-------------------------------------------------------------------------------------|-------------------------------------------------------------------------------------|-------------------------------------------------------------------------------------|
|    | 49%<br>(>30 : 1)              | 47%<br>(11.6 : 1)   | 49%<br>(5.4 : 1)                                                                  | 45%<br>(>30 : 1)  | 50%<br>(15.5 : 1)                                                                   | 57%<br>(4.8 : 1)                                                                    | 57%<br>(8.1 : 1)                                                                    |
|   | 45%<br>(>30 : 1)              | 36%<br>(>30 : 1)    | 50%<br>(>30 : 1)                                                                  | 42%<br>(>30 : 1)  | 42%<br>(>30 : 1)                                                                    | 40%<br>(12.9 : 1)                                                                   | 43%<br>(>30 : 1)                                                                    |
|  | 57%<br>(>30 : 1)              | 47%<br>(>30 : 1)    | 41%<br>(8.3 : 1)                                                                  | 57%<br>(26.2 : 1) | 59%<br>(>30 : 1)                                                                    | 43%<br>(4.6 : 1)                                                                    | 45%<br>(>30 : 1)                                                                    |
|  | 57%<br>(6.4 : 1)              | 55%<br>(7.0 : 1)    | 48%<br>(4.8 : 1)                                                                  | 63%<br>(5.8 : 1)  | 63%<br>(4.0 : 1)                                                                    | 55%<br>(5.6 : 1)                                                                    | 55%<br>(5.6 : 1)                                                                    |
|  | 59%<br>(>30 : 1)              | 63%<br>(>30 : 1)    | 49%<br>(11.3 : 1)                                                                 | 55%<br>(>30 : 1)  | <b>65%</b><br>(>30 : 1)                                                             | 51%<br>(6.5 : 1)                                                                    | 58%<br>(>30 : 1)                                                                    |
|  | 53%<br>(5.9 : 1)              | 50%<br>(6.1 : 1)    | 32%<br>(4.0 : 1)                                                                  | 60%<br>(6.9 : 1)  | 40%<br>(3.8 : 1)                                                                    | 36%<br>(4.6 : 1)                                                                    | 58%<br>(10.7 : 1)                                                                   |

#### IV. Characterization Data

**Methyl 3-*O*-(*tert*-butyldimethylsilyl)- $\alpha$ -L-fucopyranoside (3a).** Synthesized according to general procedure A, from methyl  $\alpha$ -L-fucopyranoside **2a** using 3,5-bis(trifluoromethyl)phenylboronic acid (20 mol%) and tri-*n*-butylphosphine oxide (20 mol%), >99% yield, white solid. **<sup>1</sup>H NMR (400 MHz, CD<sub>3</sub>OD):**  $\delta$  4.62 (d,  $J$  = 3.9 Hz, 1H, *H*-1), 3.92–3.84 (m, 2H, *H*-5 and *H*-3), 3.72 (dd,  $J$  = 9.8, 3.9 Hz, 1H, *H*-2), 3.61 (dd,  $J$  = 3.4, 1.4 Hz, 1H, *H*-4), 3.37 (s, 3H, OCH<sub>3</sub>), 1.22 (d,  $J$  = 6.6 Hz, 3H, CHCH<sub>3</sub>), 0.94 (s, 9H, Si(C(CH<sub>3</sub>)<sub>3</sub>)(CH<sub>3</sub>)<sub>2</sub>), 0.14 (s, 3H, Si(C(CH<sub>3</sub>)<sub>3</sub>)(CH<sub>3</sub>)<sub>2</sub>), 0.13 (s, 3H, Si(C(CH<sub>3</sub>)<sub>3</sub>)(CH<sub>3</sub>)<sub>2</sub>). **<sup>13</sup>C NMR (100 MHz, CD<sub>3</sub>OD):**  $\delta$  101.9, 74.3, 73.5, 69.9, 67.1, 55.6, 26.5, 19.2, 16.7, -4.2, -4.6. **R<sub>f</sub>:** 0.3 (ethyl acetate/pentane 25:75). **IR (Powder, cm<sup>-1</sup>):** 3471 (br), 2929 (m), 2895 (w), 1463 (w), 1359 (w), 1248 (m), 1086 (s), 1054 (s), 1000 (m), 924 (m), 836 (s), 782 (s), 678 (m). **HRMS (DART, m/z):** Calculated for C<sub>13</sub>H<sub>32</sub>NO<sub>5</sub>Si ((M+NH<sub>4</sub>)<sup>+</sup>): 310.2050; Found: 310.2057.

**Methyl 2-*O*-(*tert*-butyldimethylsilyl)- $\alpha$ -L-fucopyranoside (3a').** Synthesized according to general procedure B, from methyl  $\alpha$ -L-fucopyranoside **2a**, <3% yield, viscous colourless oil. **<sup>1</sup>H NMR (400 MHz, CD<sub>3</sub>OD):**  $\delta$  4.57 (d,  $J$  = 3.8 Hz, 1H, *H*-1), 3.93–3.87 (m, 2H, *H*-5 and *H*-2), 3.71 (dd,  $J$  = 9.8, 3.5 Hz, 1H, *H*-3), 3.65 (dd,  $J$  = 3.5, 1.3 Hz, 1H, *H*-4), 3.36 (s, 3H, OCH<sub>3</sub>), 1.21 (d,  $J$  = 6.6 Hz, 1H, CHCH<sub>3</sub>), 0.92 (s, 9H, Si(C(CH<sub>3</sub>)<sub>3</sub>)(CH<sub>3</sub>)<sub>2</sub>), 0.12 (s, 3H, Si(C(CH<sub>3</sub>)<sub>3</sub>)(CH<sub>3</sub>)<sub>2</sub>), 0.12 (s, 3H, Si(C(CH<sub>3</sub>)<sub>3</sub>)(CH<sub>3</sub>)<sub>2</sub>). **R<sub>f</sub>:** 0.2 (ethyl acetate/pentane 25:75).

**Methyl 3-*O*-(triethylsilyl)- $\alpha$ -L-fucopyranoside (3b).** Synthesized according to general procedure A, from methyl  $\alpha$ -L-fucopyranoside **2a**, 62% yield, viscous colourless oil. **<sup>1</sup>H NMR (400 MHz, CD<sub>3</sub>OD):**  $\delta$  4.62 (d,  $J$  = 3.9 Hz, 2H, *H*-1), 3.89 (qd,  $J$  = 6.7, 1.2 Hz, 1H, *H*-5), 3.84 (dd,  $J$  = 9.8, 3.5 Hz, 1H, *H*-3), 3.72 (dd,  $J$  = 9.8, 3.9 Hz, 1H, *H*-2), 3.59 (dd,  $J$  = 3.5, 1.2 Hz, 1H, *H*-4), 3.37 (s, 3H, OCH<sub>3</sub>), 1.22 (d,  $J$  = 6.7 Hz, 3H, CHCH<sub>3</sub>), 1.00 (t,  $J$  = 8.0 Hz, 9H, Si(CH<sub>2</sub>CH<sub>3</sub>)<sub>3</sub>), 0.69 (q,  $J$  = 8.0 Hz, 6H, Si(CH<sub>2</sub>CH<sub>3</sub>)<sub>3</sub>). **<sup>13</sup>C NMR (100 MHz, CD<sub>3</sub>OD):**  $\delta$  101.8, 74.4, 73.3, 69.8, 67.1, 55.6, 16.7, 7.2, 5.8. **R<sub>f</sub>:** 0.25 (ethyl acetate/pentane 25:75). **IR (Neat, cm<sup>-1</sup>):** 3244 (br), 2934 (m), 2909 (m), 1458 (w), 1361 (w), 1132 (m), 1079 (s), 1037 (s), 959 (s), 916 (m), 809 (m), 725 (s). **HRMS (DART, m/z):** Calculated for C<sub>13</sub>H<sub>32</sub>NO<sub>5</sub>Si ((M+NH<sub>4</sub>)<sup>+</sup>): 310.2050; Found: 310.2056.

**Methyl 2-*O*-(triethylsilyl)- $\alpha$ -L-fucopyranoside (3b').** Isolated from same reaction mixture as **3b**, 5% yield, viscous colourless oil. **<sup>1</sup>H NMR (400 MHz, CD<sub>3</sub>OD):**  $\delta$  4.57 (d,  $J$  = 3.8 Hz, 1H, *H*-1), 3.93–3.87 (m, 2H, *H*-5 and *H*-2), 3.71 (dd,  $J$  = 9.8, 3.5 Hz, 1H, *H*-3), 3.65 (dd,  $J$  = 3.5, 1.3 Hz, 1H, *H*-4), 3.36 (s, 3H, OCH<sub>3</sub>), 1.21 (d,  $J$  = 6.6 Hz, 3H, CHCH<sub>3</sub>), 1.00 (t,  $J$  = 7.9 Hz, 9H, Si(CH<sub>2</sub>CH<sub>3</sub>)<sub>3</sub>), 0.67 (q,  $J$  = 7.9 Hz, 6H, Si(CH<sub>2</sub>CH<sub>3</sub>)<sub>3</sub>). **R<sub>f</sub>:** 0.15 (ethyl acetate/pentane 25:75).

**Methyl 3-*O*-(*tert*-butyldiphenylsilyl)- $\alpha$ -L-fucopyranoside (3c).** Synthesized according to

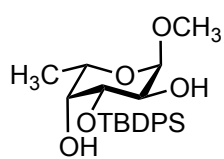

general procedure A, from methyl  $\alpha$ -L-fucopyranoside **2a** and *tert*-butyldiphenylsilyl chloride using 4-(dimethylamino)phenylboronic acid (20 mol%) and tri-*n*-butylphosphine oxide (20 mol%), 75% yield, viscous colourless oil. Spectral data were in agreement with literature values.<sup>1</sup> **<sup>1</sup>H NMR (400 MHz, CDCl<sub>3</sub>):**  $\delta$  7.76–7.68 (m, 4H, ArH), 7.47–7.37 (m, 6H, ArH), 4.68 (d,  $J$  = 3.8 Hz, 1H, H-1), 3.92–3.82 (m, 2H, H-2 and H-3), 3.68 (q,  $J$  = 6.7 Hz, 1H, H-5), 3.44–3.43 (m, 1H, H-4), 3.29 (s, 3H, OCH<sub>3</sub>), 2.55 (br s, 1H, C<sub>4</sub>-OH), 1.54 (d,  $J$  = 9.3 Hz, 1H, C<sub>2</sub>-OH), 1.22 (d,  $J$  = 6.6 Hz, 3H, CHCH<sub>3</sub>), 1.11 (s, 9H, Si(C(CH<sub>3</sub>)<sub>3</sub>)Ph<sub>2</sub>). **R<sub>f</sub>**: 0.45 (ethyl acetate/pentane 25:75).

**Methyl 3-*O*-(*tert*-butyldimethylsilyl)- $\alpha$ -L-rhamnopyranoside (3d).** Synthesized according to

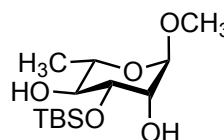

general procedure A, from methyl  $\alpha$ -L-rhamnopyranoside **2d** using 3,5-bis(trifluoromethyl)phenylboronic acid (20 mol%) and tri-*n*-butylphosphine oxide (20 mol%), >99% yield, viscous colourless oil. **<sup>1</sup>H NMR (400 MHz, CDCl<sub>3</sub>):**  $\delta$  4.68 (d,  $J$  = 1.3 Hz, 1H, H-1), 3.81–3.77 (m, 2H, H-3 and H-2), 3.67–3.60 (m, 1H, H-5), 3.46 (dd,  $J$  = 9.0, 9.0 Hz, 1H, H-4), 3.35 (s, 3H, OCH<sub>3</sub>), 2.51 (br s, 1H, C<sub>2</sub>-OH), 1.96 (br s, 1H, C<sub>4</sub>-OH), 1.31 (d,  $J$  = 6.2 Hz, 3H, CHCH<sub>3</sub>), 0.91 (s, 9H, Si(C(CH<sub>3</sub>)<sub>3</sub>)(CH<sub>3</sub>)<sub>2</sub>), 0.14 (s, 3H, Si(C(CH<sub>3</sub>)<sub>3</sub>)(CH<sub>3</sub>)<sub>2</sub>), 0.13 (s, 3H, Si(C(CH<sub>3</sub>)<sub>3</sub>)(CH<sub>3</sub>)<sub>2</sub>). **<sup>13</sup>C NMR (100 MHz, CDCl<sub>3</sub>):**  $\delta$  101.1, 73.3, 73.2, 71.5, 67.3, 54.8, 25.7, 18.0, 17.6, -4.6, -4.6. **R<sub>f</sub>**: 0.3 (ethyl acetate/pentane 20:80). **IR (Neat, cm<sup>-1</sup>):** 3465 (br), 2929 (m), 2957 (w), 1523 (w), 1464 (m), 1253 (m), 1108 (s), 1054 (s), 973 (m), 836 (s), 779 (s), 675 (m). **HRMS (DART, m/z):** Calculated for C<sub>13</sub>H<sub>32</sub>NO<sub>5</sub>Si ((M+NH<sub>4</sub>)<sup>+</sup>): 310.2050; Found: 310.2041.

**Methyl 3-*O*-(*tert*-butyldimethylsilyl)- $\beta$ -D-arabinopyranoside (3e).** Synthesized according to

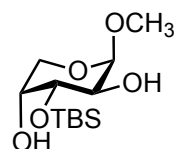

general procedure A, from methyl  $\beta$ -D-arabinopyranoside **2e** using 4-(dimethylamino)phenylboronic acid (20 mol%) and pyridine *N*-oxide (40 mol%), 84% yield, viscous yellow oil. Spectral data were consistent with literature values.<sup>2</sup> **<sup>1</sup>H NMR (400 MHz, CD<sub>3</sub>OD):**  $\delta$  4.66 (d,  $J$  = 3.5 Hz, 1H, H-1), 3.88 (dd,  $J$  = 9.0, 3.4 Hz, 1H, H-3), 3.82 (dd,  $J$  = 3.2, 1.8 Hz, 1H, H-4), 3.77–3.72 (m, 2H, H-5a and H-2), 3.58 (dd,  $J$  = 12.2, 2.9 Hz, 1H, H-5b), 3.39 (s, 3H, OCH<sub>3</sub>), 0.94 (s, 9H, Si(C(CH<sub>3</sub>)<sub>3</sub>)(CH<sub>3</sub>)<sub>2</sub>), 0.14 (s, 3H, Si(C(CH<sub>3</sub>)<sub>3</sub>)(CH<sub>3</sub>)<sub>2</sub>), 0.13 (s, 3H, Si(C(CH<sub>3</sub>)<sub>3</sub>)(CH<sub>3</sub>)<sub>2</sub>). **<sup>13</sup>C NMR (100 MHz, CD<sub>3</sub>OD):**  $\delta$  102.2, 72.8, 71.0, 70.4, 63.6, 55.9, 26.5, 19.2, -4.3, -4.6. **R<sub>f</sub>**: 0.25 (ethyl acetate/pentane 45:55).

<sup>1</sup> M. S. Arias-Pérez, M. S. López, M. J. Santos, *J. Chem. Soc., Perkin Trans. 2*, 2002, 1549.

<sup>2</sup> M.-K. Chung, G. Orlova, J. D. Goddard, M. Schlaf, R. Harris, T. J. Beveridge, G. White, F. R. Hallett, *J. Am. Chem. Soc.*, 2002, **124**, 10508.

**Methyl 2-*O*-(*tert*-butyldimethylsilyl)- $\beta$ -D-arabinopyranoside (3e').** Synthesized according to general procedure B, from methyl  $\beta$ -D-arabinopyranoside **2e**, 13% yield, isolated as a 1.7:1 3-OTBS : 2-OTBS mixture, viscous yellow oil. Spectral data were consistent with literature values.<sup>2</sup> **<sup>1</sup>H NMR (400 MHz, CD<sub>3</sub>OD):**  $\delta$  4.61 (d,  $J$  = 3.5 Hz, 1H, *H*-1), 3.90 (dd,  $J$  = 9.0, 3.5 Hz, 1H, *H*-2), 3.86 (dd,  $J$  = 3.0, 2.9 Hz, 1H, *H*-4), 3.79–3.71 (m, 2H, *H*-5a and *H*-3), 3.56 (dd,  $J$  = 12.1, 3.0 Hz, 1H, *H*-5b), 3.38 (s, 3H, OCH<sub>3</sub>), 0.92 (s, 9H, Si(C(CH<sub>3</sub>)<sub>3</sub>)(CH<sub>3</sub>)<sub>2</sub>), 0.11 (s, 6H, Si(C(CH<sub>3</sub>)<sub>3</sub>)(CH<sub>3</sub>)<sub>2</sub>). **R<sub>f</sub>**: 0.4 (ethyl acetate/pentane 45:55).

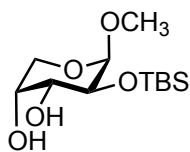

**Methyl 3,6-di-*O*-(*tert*-butyldimethylsilyl)- $\alpha$ -D-galactopyranoside (3f).** Synthesized according to general procedure A, from methyl  $\alpha$ -D-galactopyranoside **2f** and *tert*-butyldimethylsilyl chloride (5 equiv.) and *N,N*-diisopropylethylamine (5 equiv.), 82% yield, white solid. Spectral data were consistent with literature values.<sup>2</sup> **<sup>1</sup>H NMR (400 MHz, CDCl<sub>3</sub>):**  $\delta$  4.68 (d,  $J$  = 3.8 Hz, 1H, *H*-1), 3.86–3.71 (m, 6H, *H*-2, *H*-3, *H*-4, *H*-5, *H*-6a and *H*-6b), 3.39 (s, 3H, OCH<sub>3</sub>), 0.94 (s, 9H, Si(C(CH<sub>3</sub>)<sub>3</sub>)(CH<sub>3</sub>)<sub>2</sub>), 0.91 (s, 9H, Si(C(CH<sub>3</sub>)<sub>3</sub>)(CH<sub>3</sub>)<sub>2</sub>), 0.14 (s, 3H, Si(C(CH<sub>3</sub>)<sub>3</sub>)(CH<sub>3</sub>)<sub>2</sub>), 0.14 (s, 3H, Si(C(CH<sub>3</sub>)<sub>3</sub>)(CH<sub>3</sub>)<sub>2</sub>), 0.09 (s, 6H, Si(C(CH<sub>3</sub>)<sub>3</sub>)(CH<sub>3</sub>)<sub>2</sub>). **<sup>13</sup>C NMR (100 MHz, CD<sub>3</sub>OD):**  $\delta$  101.8, 73.5, 72.0, 71.2, 70.2, 63.5, 55.6, 26.5, 26.3, 19.2, 19.1, -4.2, -4.6, -5.2, -5.3. **R<sub>f</sub>**: 0.25 (ethyl acetate/pentane 15:85).

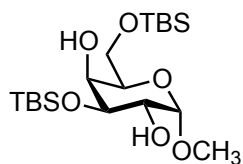

**Methyl 3,6-di-*O*-(*tert*-butyldimethylsilyl)- $\alpha$ -D-mannopyranoside (3g).** Synthesized according to general procedure A, from methyl  $\alpha$ -D-mannopyranoside **2g**, TBSCl (1.0 mmol) and *i*-Pr<sub>2</sub>NEt (1.0 mmol), using 3,5-bis(trifluoromethyl)phenylboronic acid (20 mol%) and tri-*n*-butylphosphine oxide (20 mol%), 86% yield, white solid. Spectral data were in agreement with literature values.<sup>3</sup> **<sup>1</sup>H NMR (400 MHz, CDCl<sub>3</sub>):**  $\delta$  4.72 (d,  $J$  = 1.5 Hz, 1H, *H*-1), 3.87 (dd,  $J$  = 5.5, 1.4 Hz, 2H, *H*-6a and *H*-6b), 3.84 (dd,  $J$  = 8.9, 3.6 Hz, 1H, *H*-3), 3.76–3.74 (m, 1H, *H*-2), 3.70 (ddd,  $J$  = 9.4, 8.9, 1.9 Hz, 1H, *H*-4), 3.56 (ddd,  $J$  = 9.4, 5.5, 5.5 Hz, 1H, *H*-5), 3.36 (s, 3H, OCH<sub>3</sub>), 2.70 (d,  $J$  = 1.9 Hz, 1H, C<sub>4</sub>-OH), 2.57 (br s, 1H, C<sub>2</sub>-OH), 0.91 (s, 9H, Si(C(CH<sub>3</sub>)<sub>3</sub>)(CH<sub>3</sub>)<sub>2</sub>), 0.90 (s, 9H, Si(C(CH<sub>3</sub>)<sub>3</sub>)(CH<sub>3</sub>)<sub>2</sub>), 0.15 (s, 3H, Si(C(CH<sub>3</sub>)<sub>3</sub>)(CH<sub>3</sub>)<sub>2</sub>), 0.14 (s, 3H, Si(C(CH<sub>3</sub>)<sub>3</sub>)(CH<sub>3</sub>)<sub>2</sub>), 0.09 (s, 6H, Si(C(CH<sub>3</sub>)<sub>3</sub>)(CH<sub>3</sub>)<sub>2</sub>). **<sup>13</sup>C NMR (100 MHz, CDCl<sub>3</sub>):**  $\delta$  100.1, 73.1, 71.1, 70.6, 70.4, 64.9, 54.8, 25.9, 25.8, 18.3, 18.1, -4.5, -4.8, -5.4, -5.5. **R<sub>f</sub>**: 0.4 (ethyl acetate/pentane 10:90).

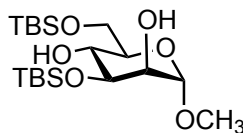

<sup>3</sup> A. Pastore, M. Adinolfi, A. Iadonisi, S. Valerio, *Carbohydr. Res.*, 2010, **345**, 1316.

**Section V:  $^1\text{H}$ , COSY and  $^{13}\text{C}$  NMR Spectra.**  
**See Section IV for experimental details and assignments of spectra.**

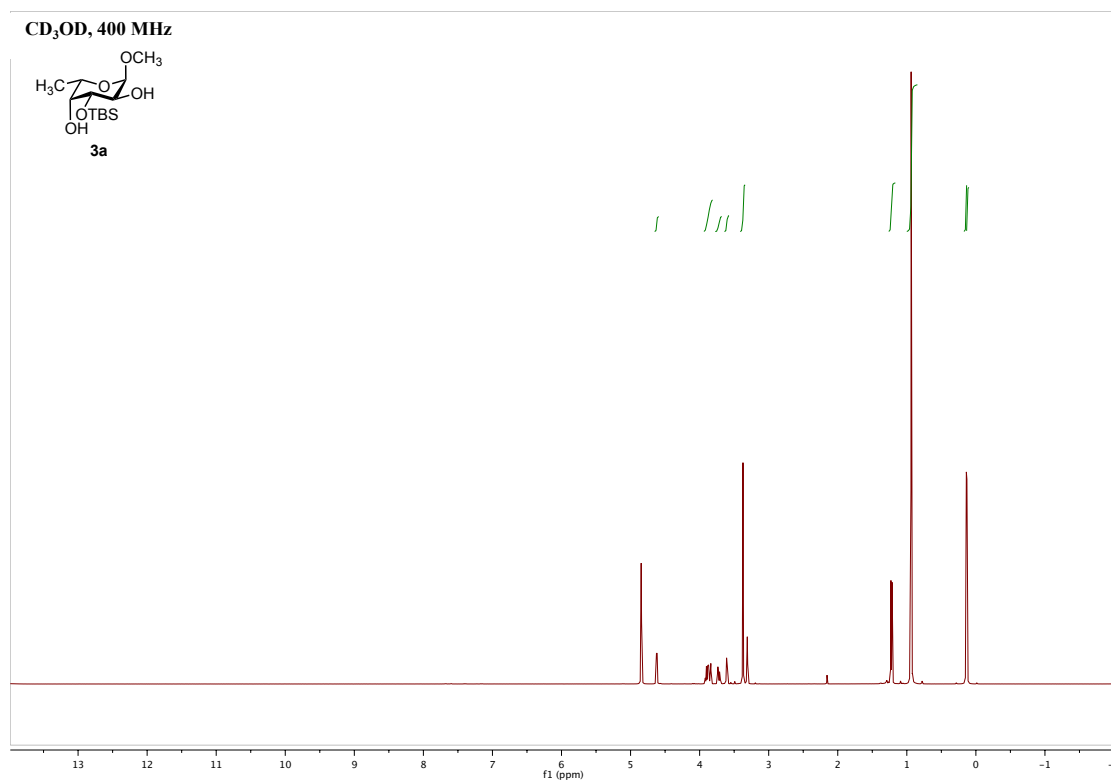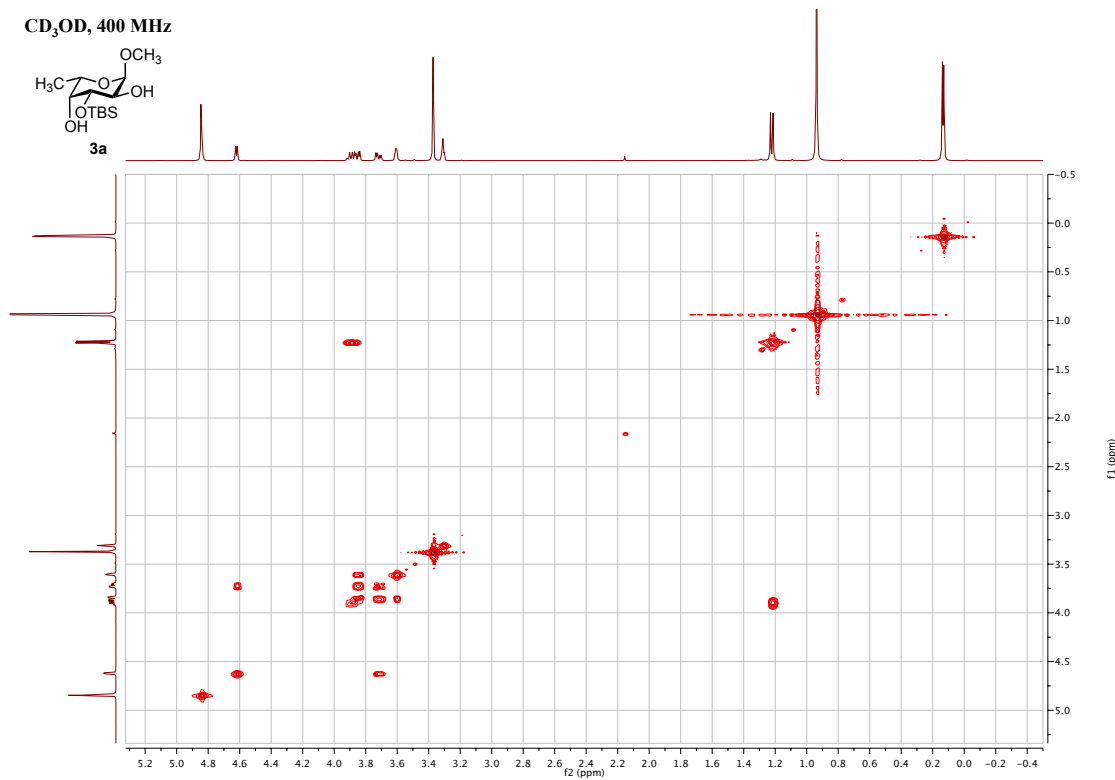



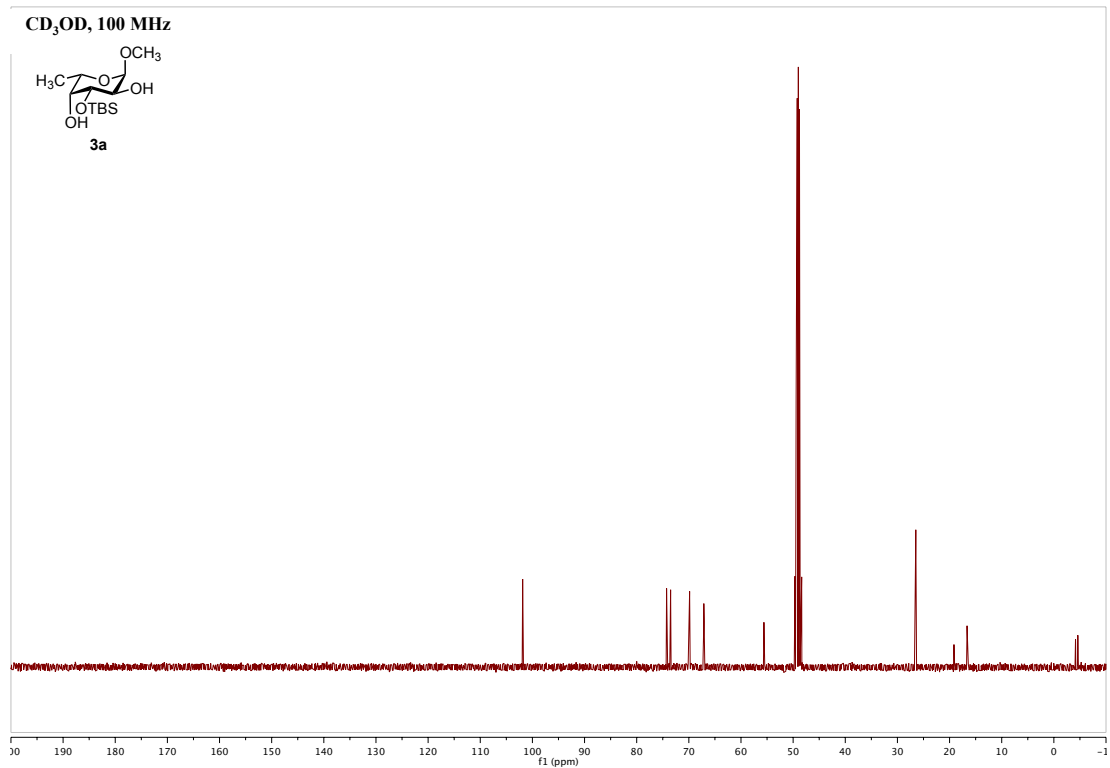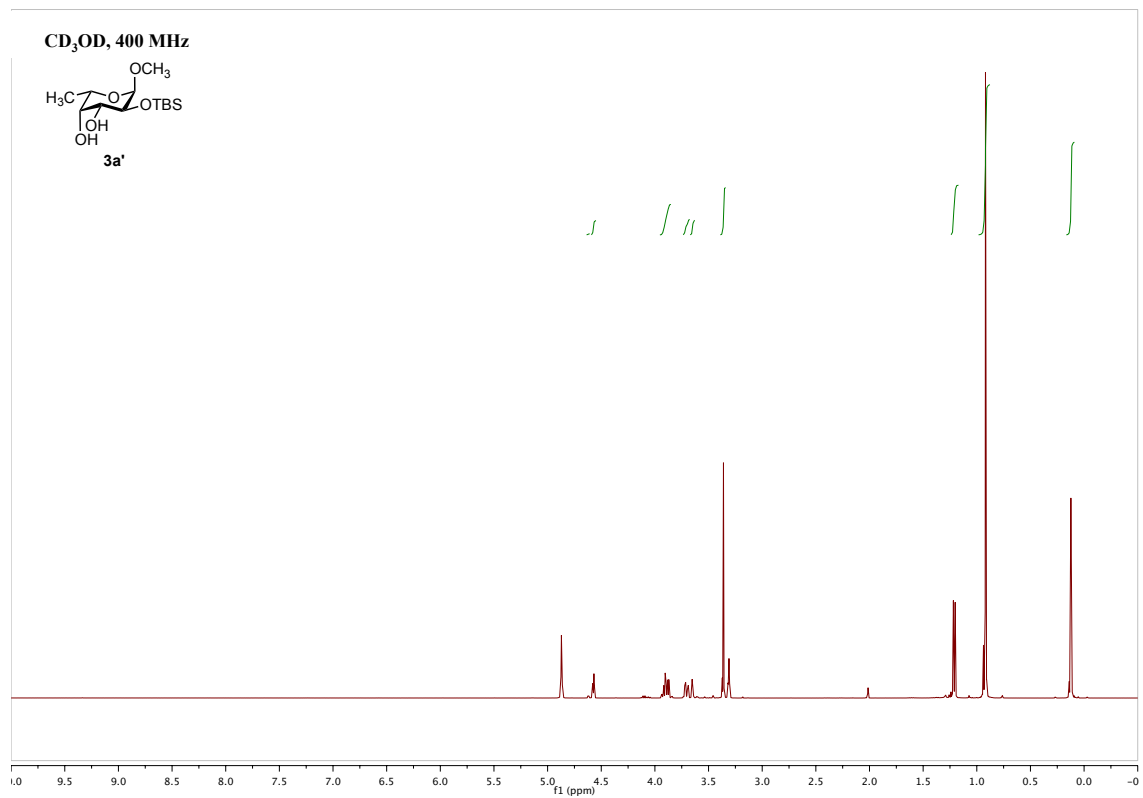

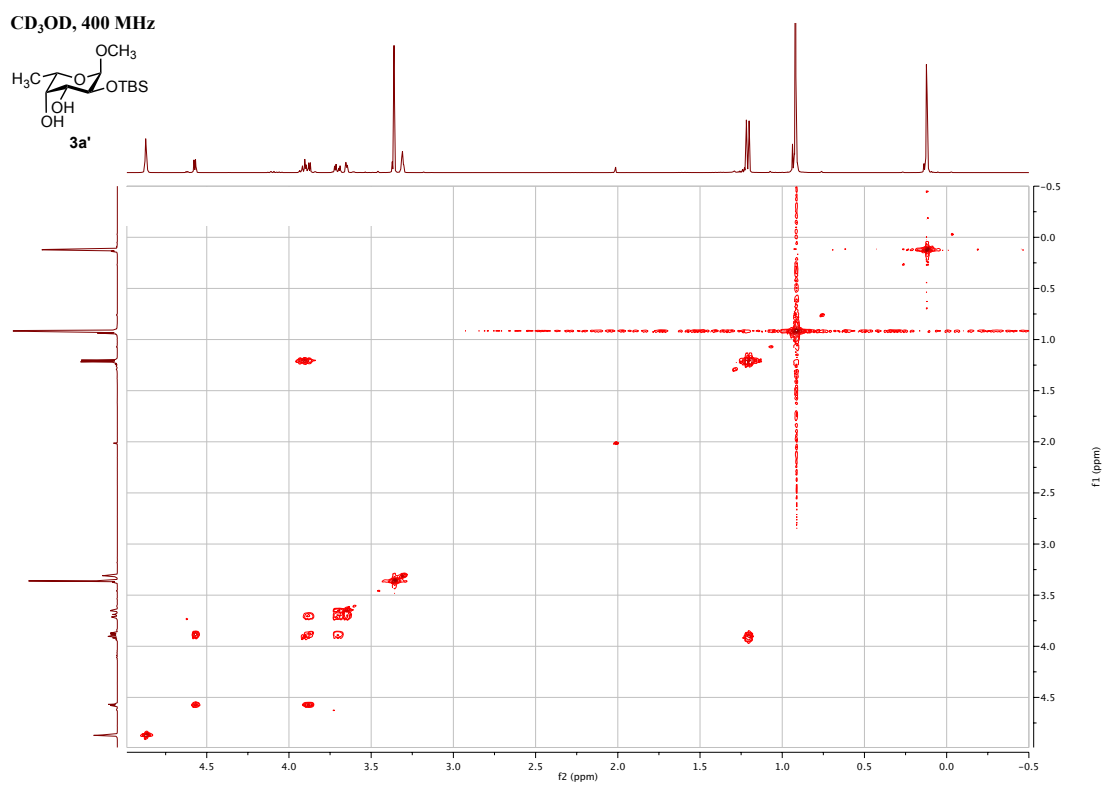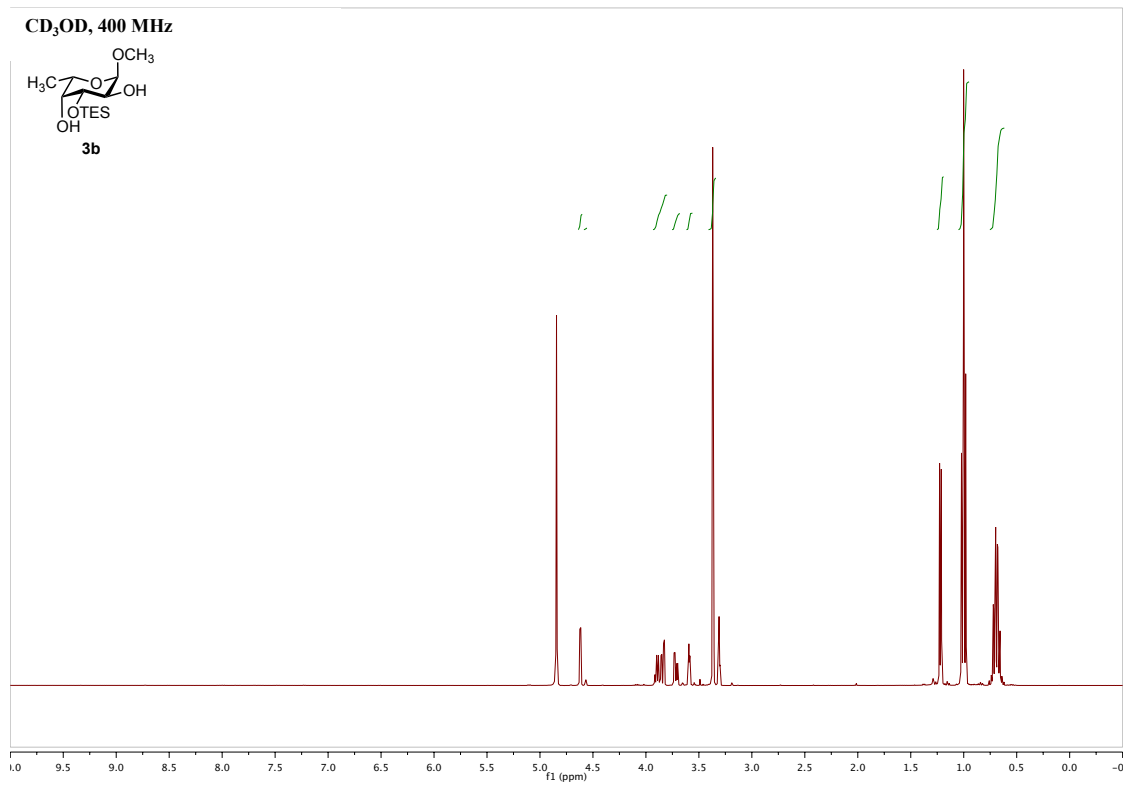

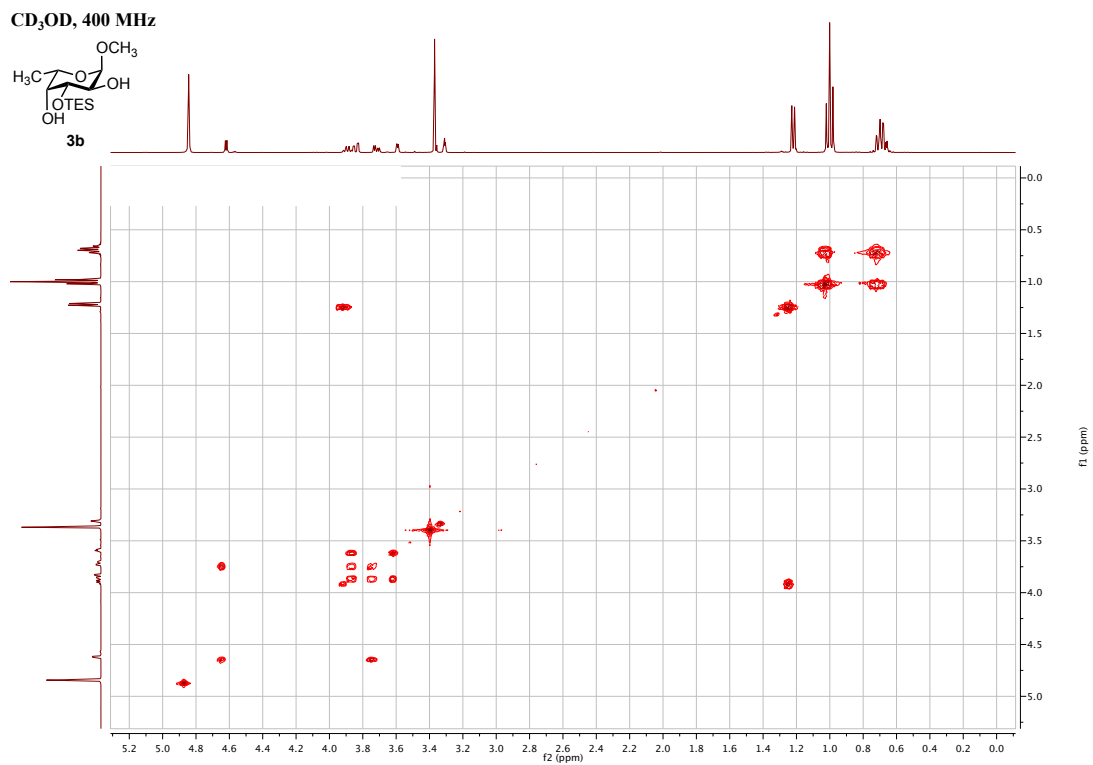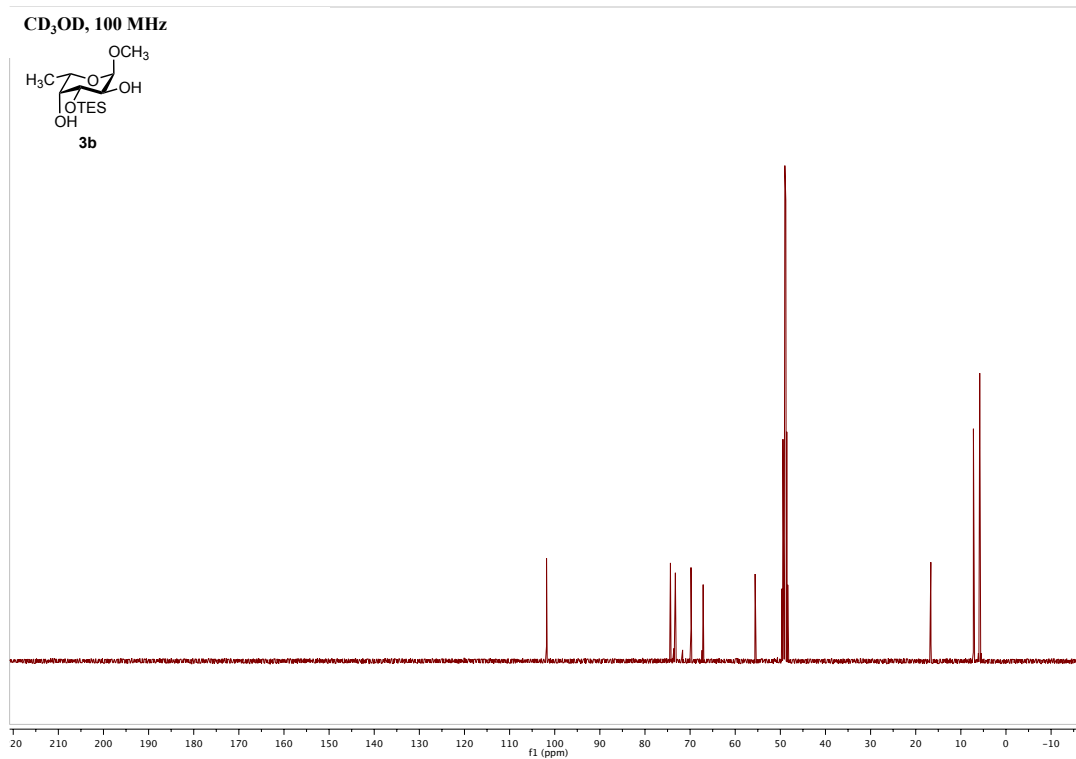

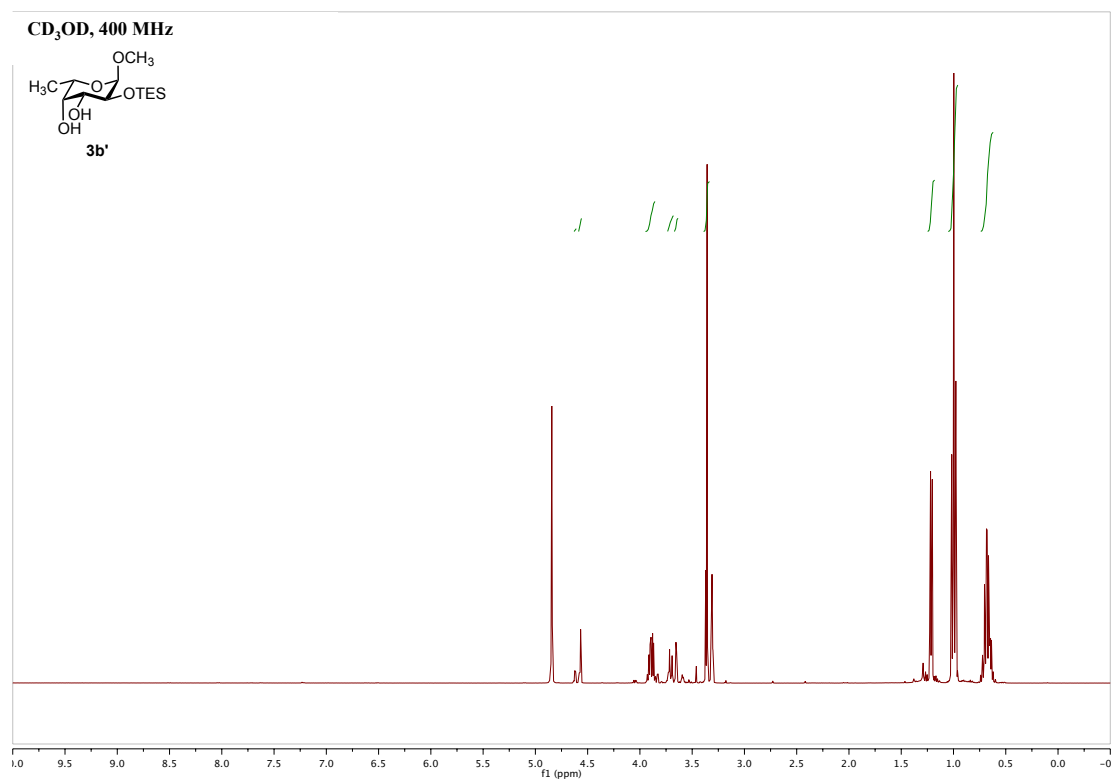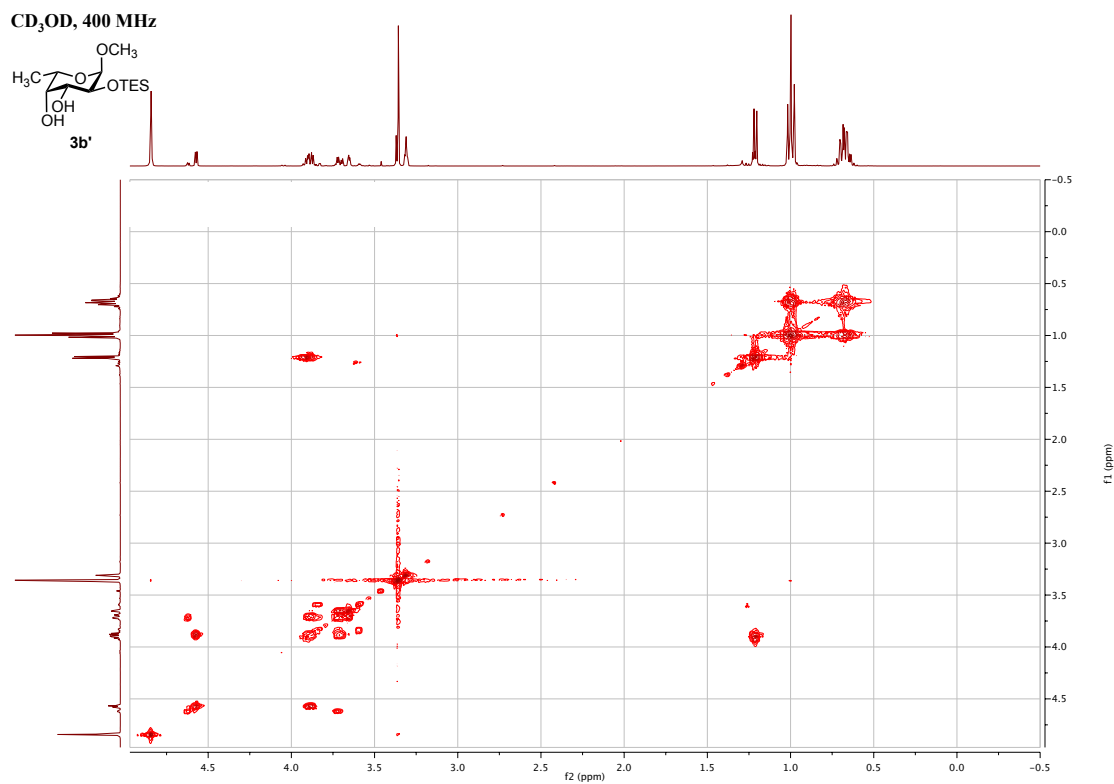

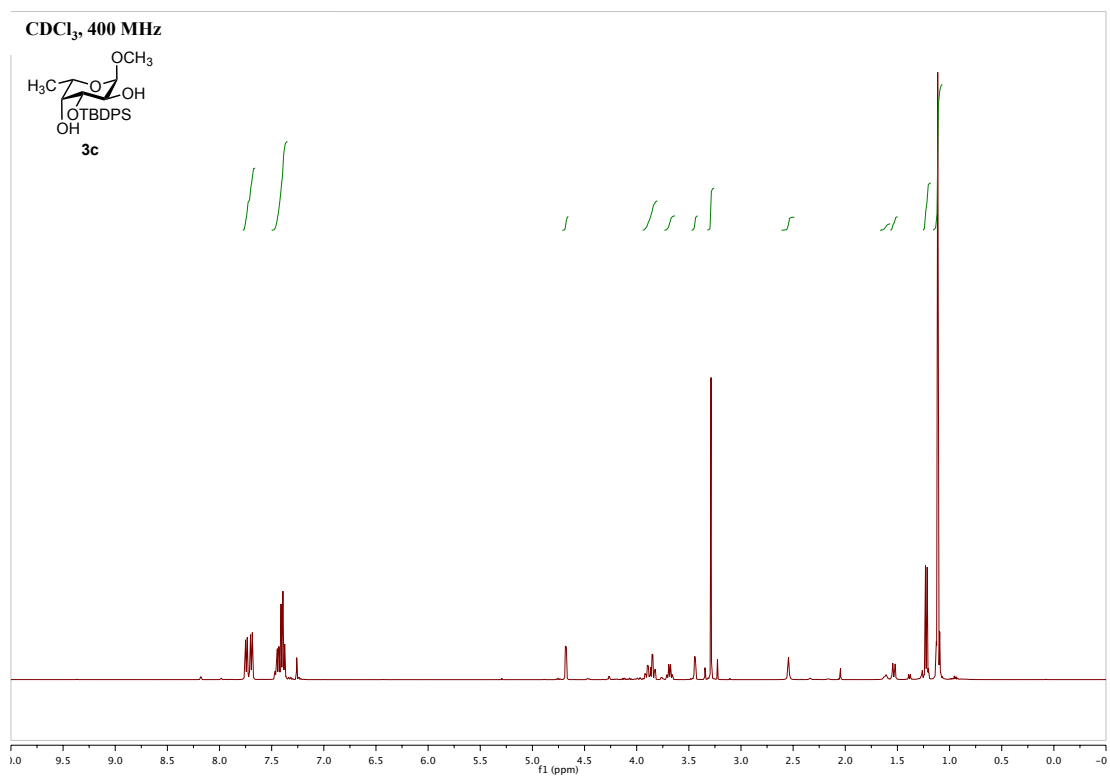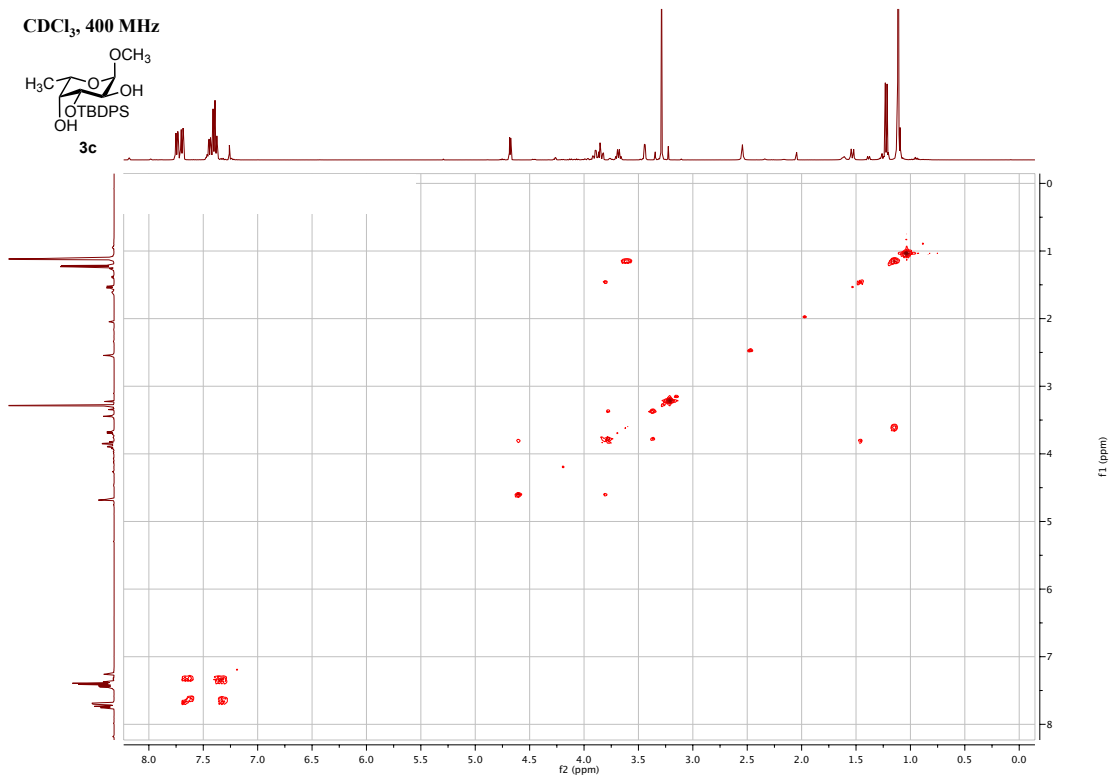

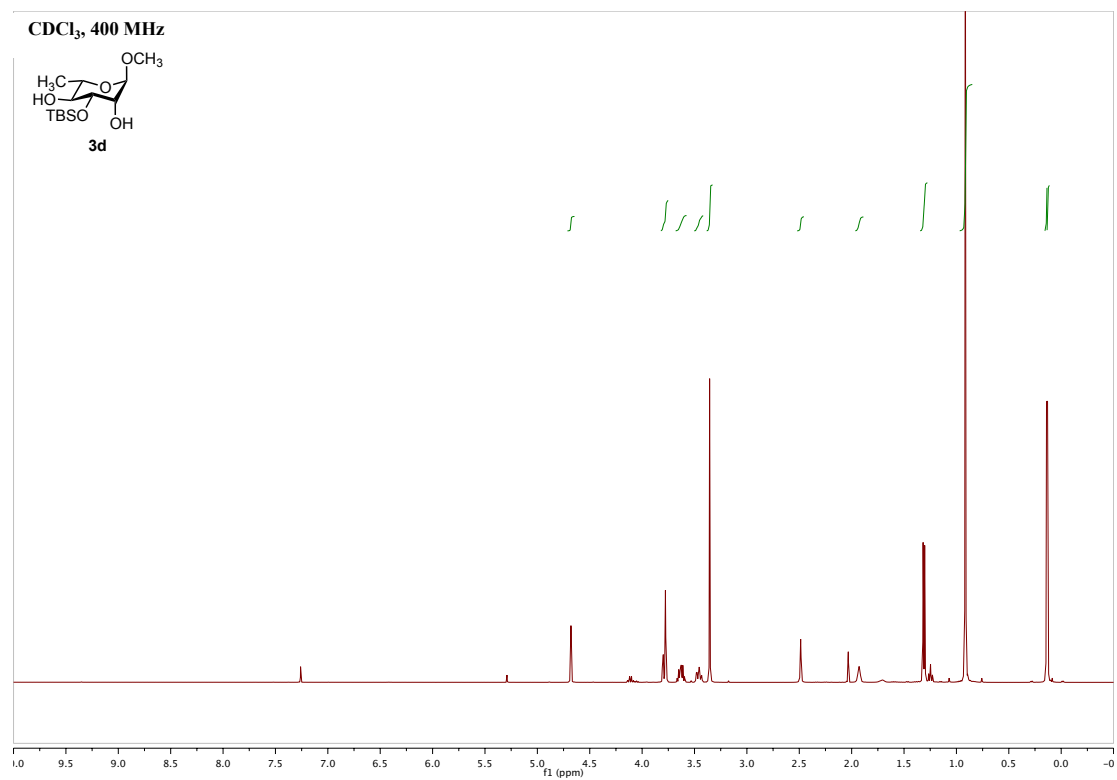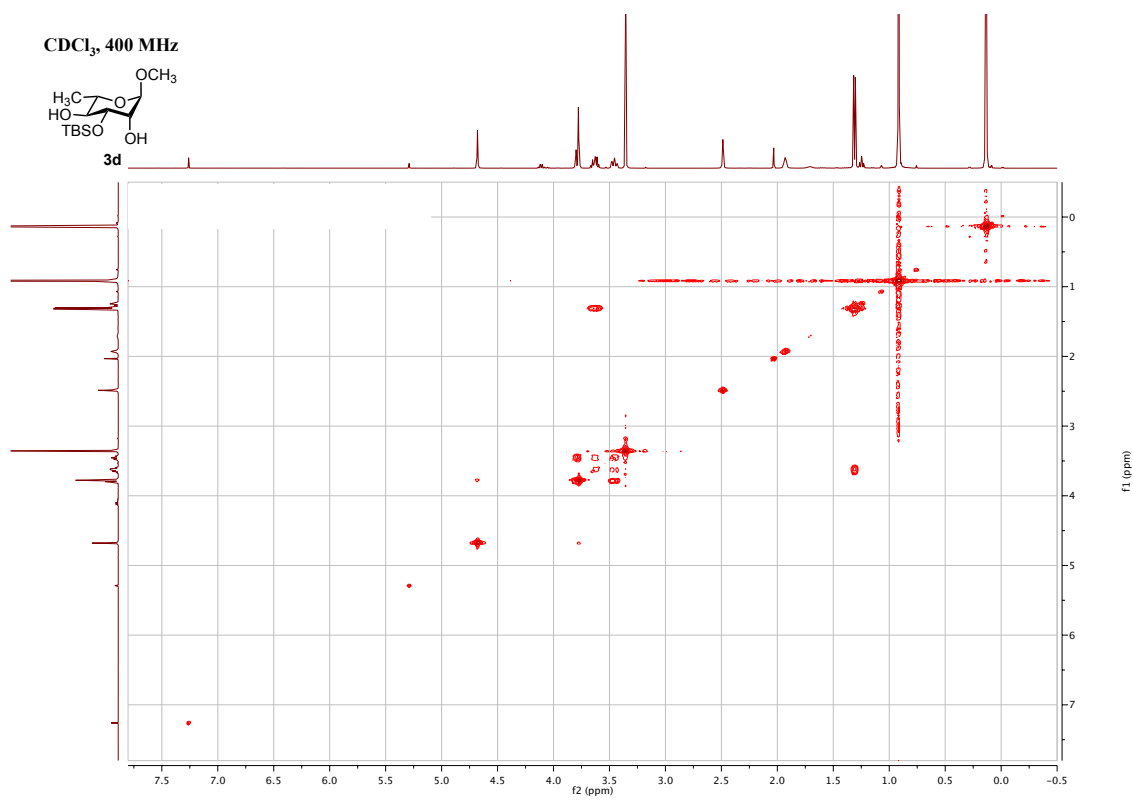

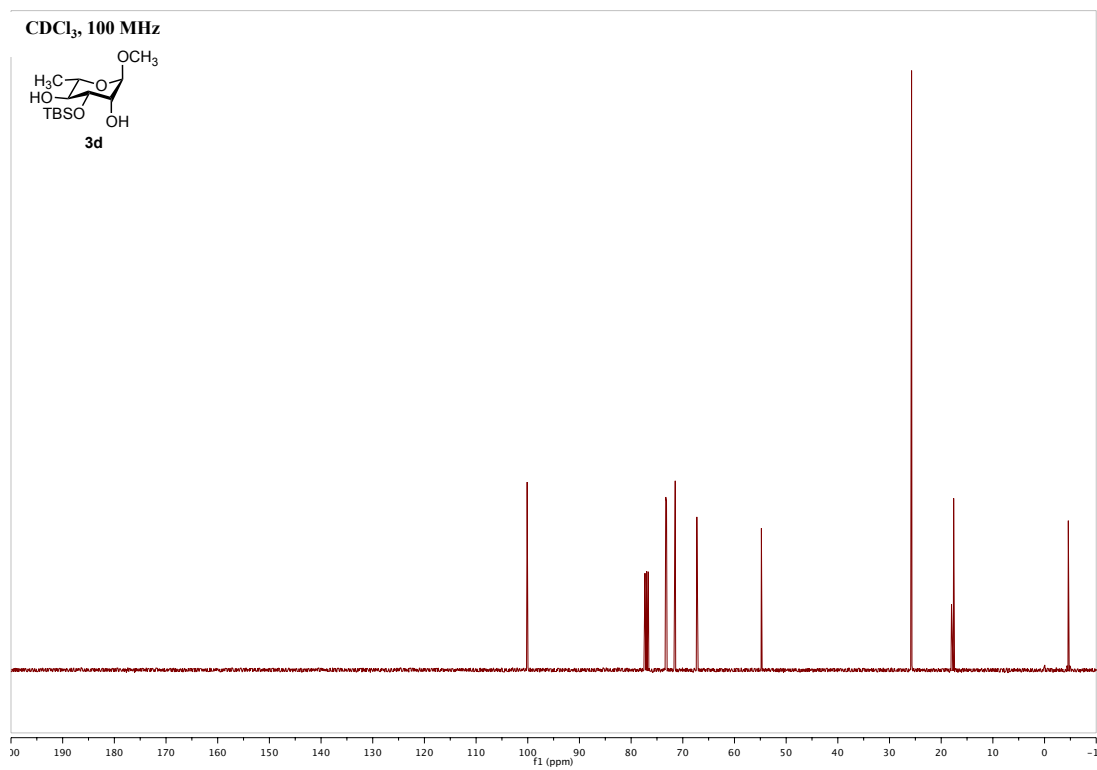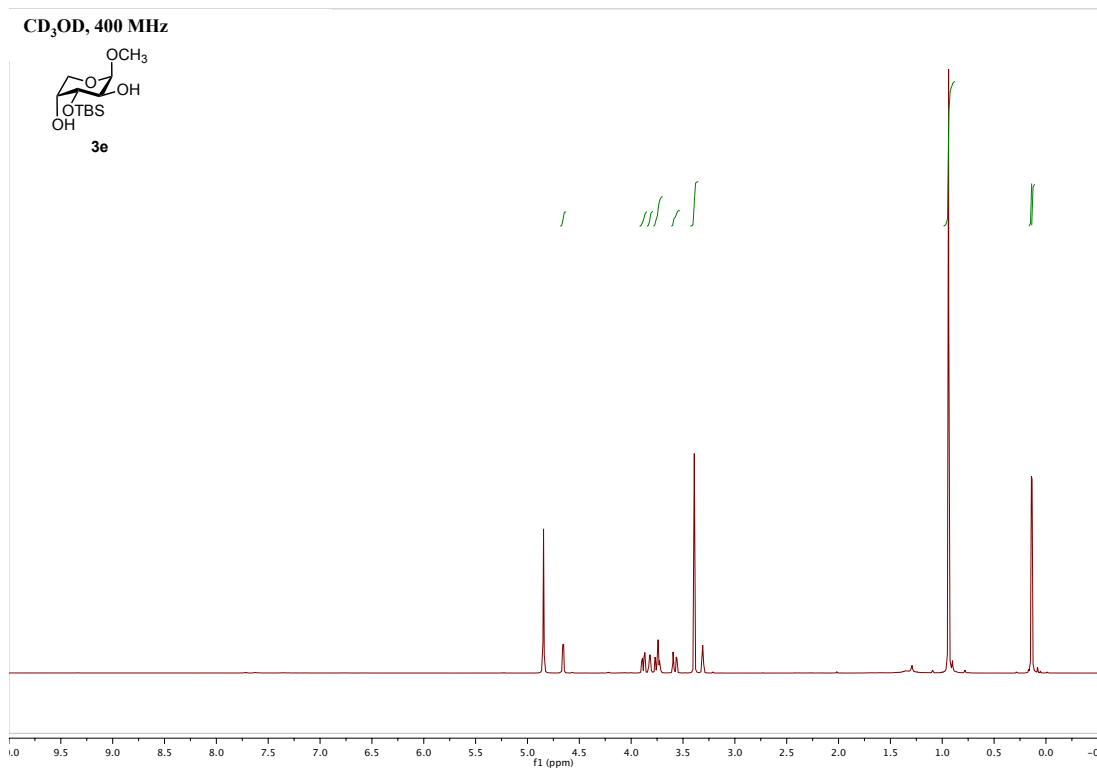

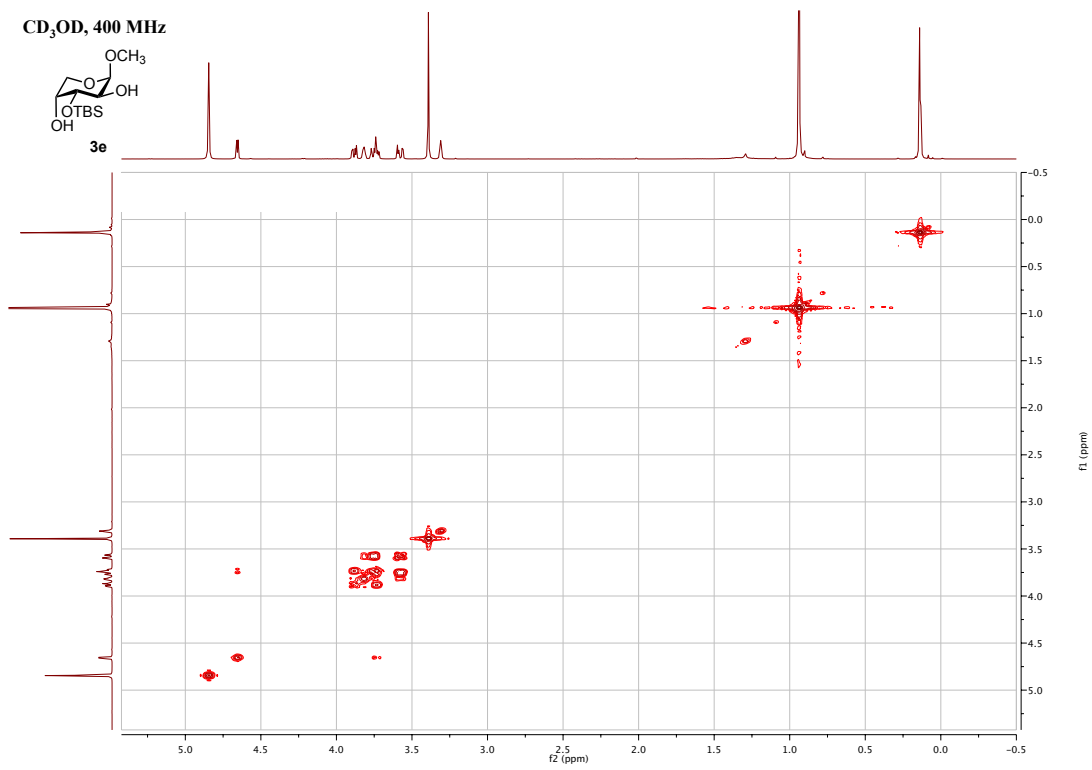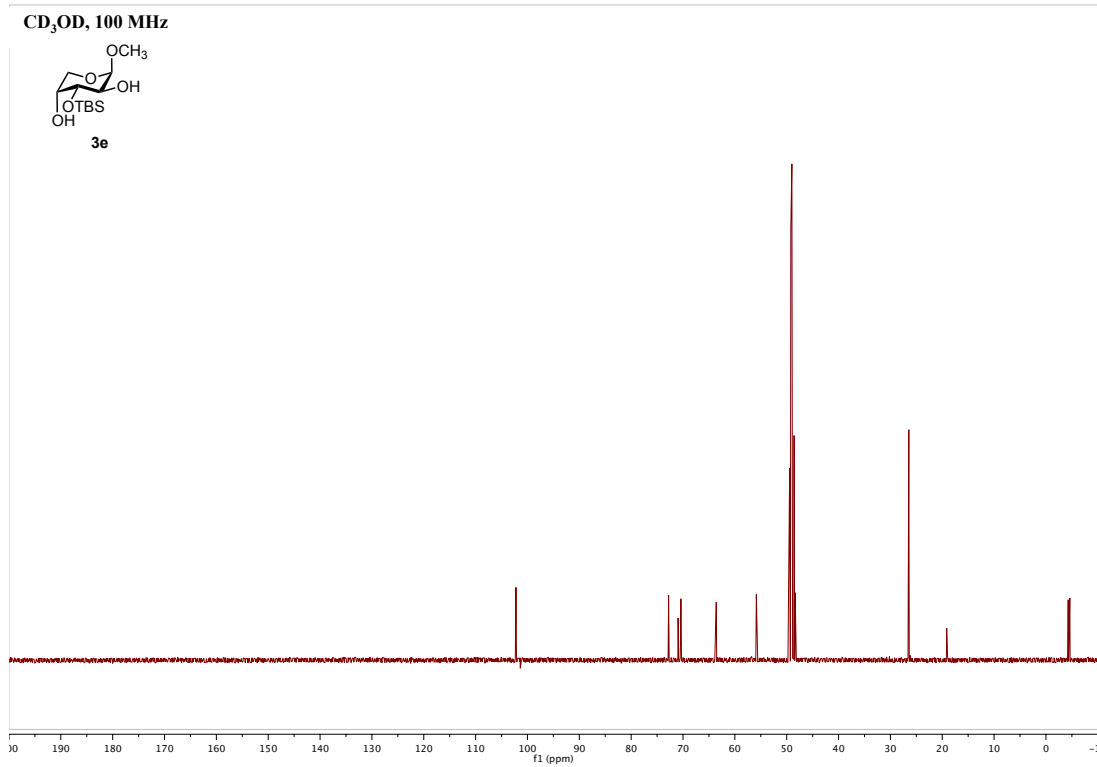



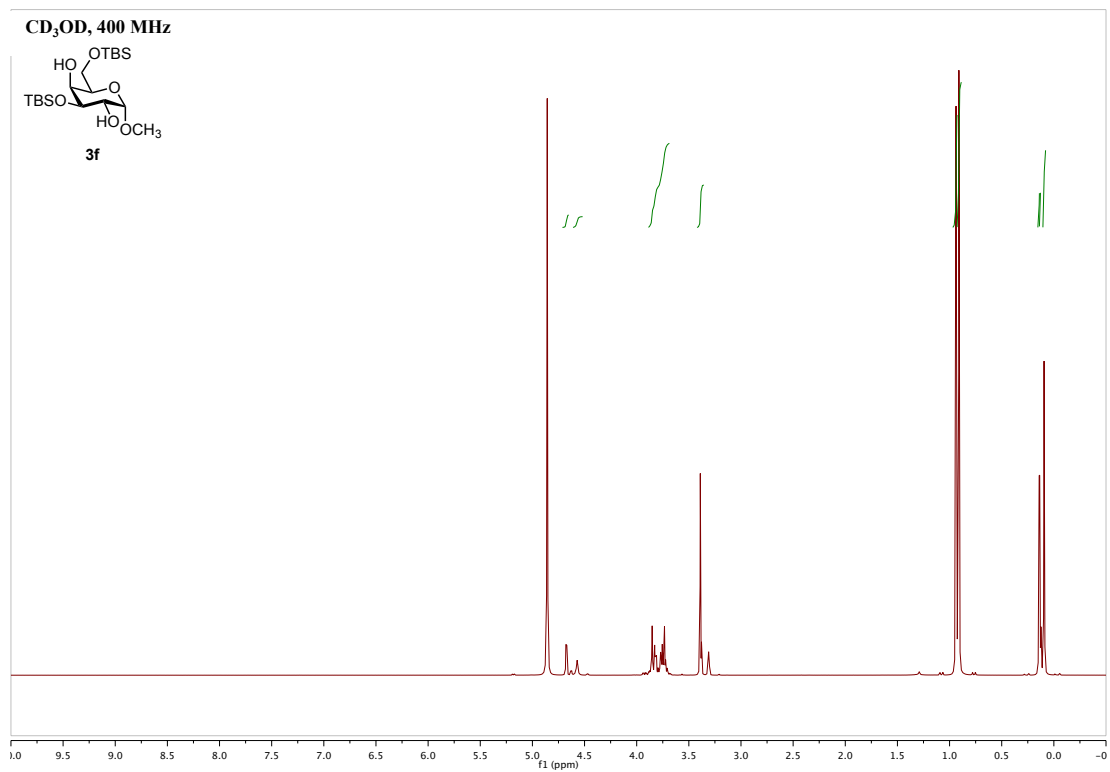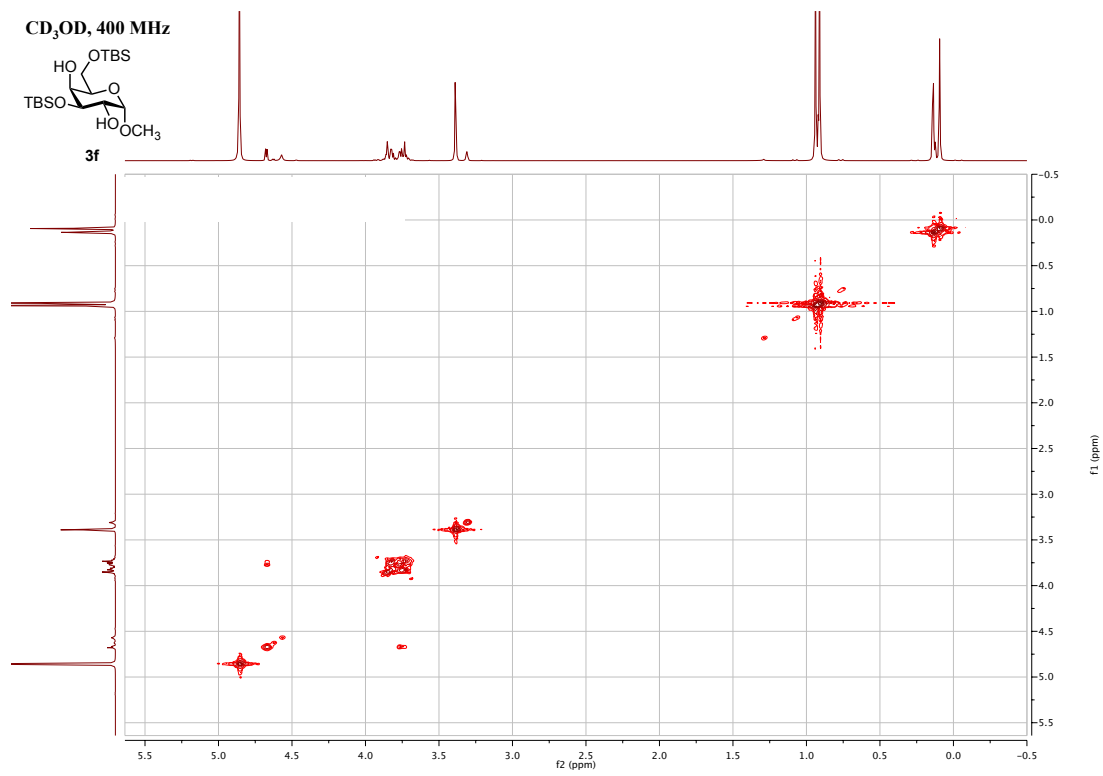

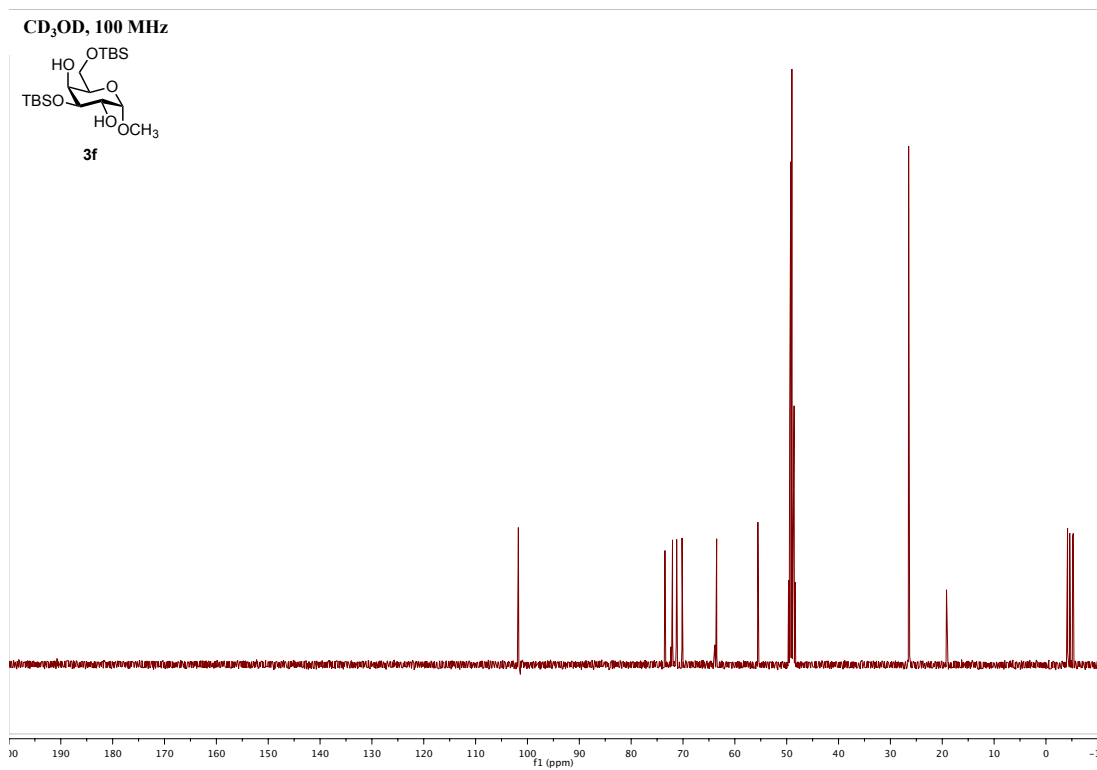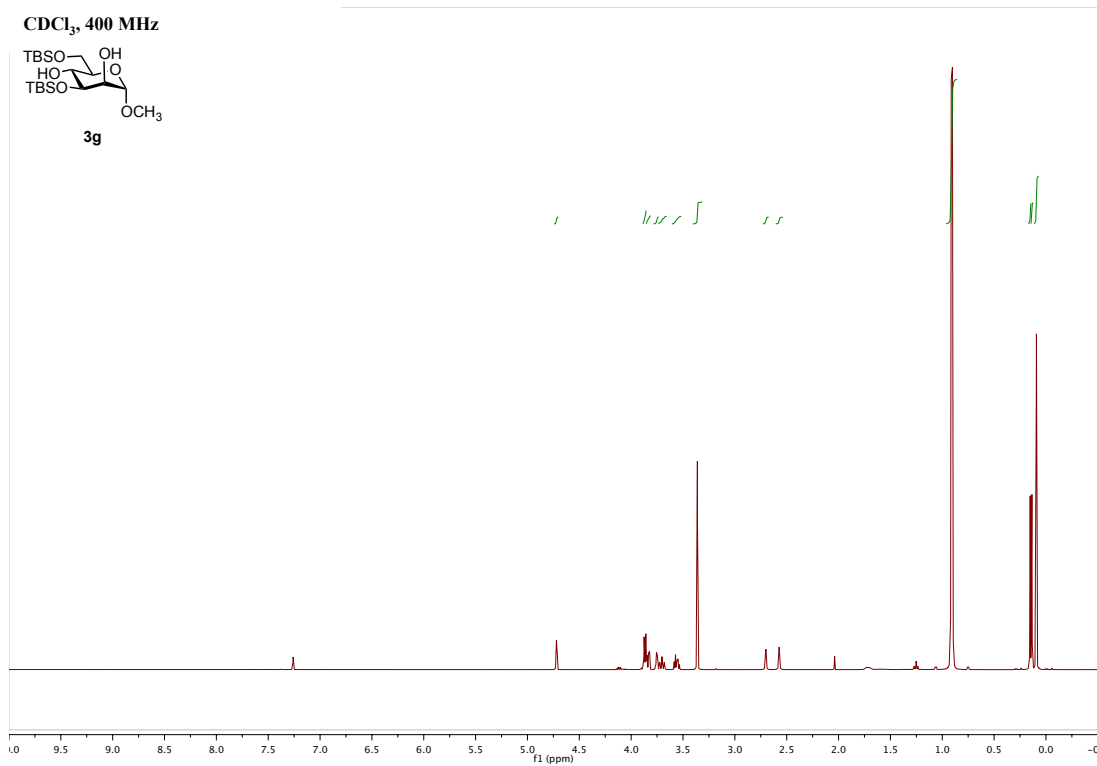

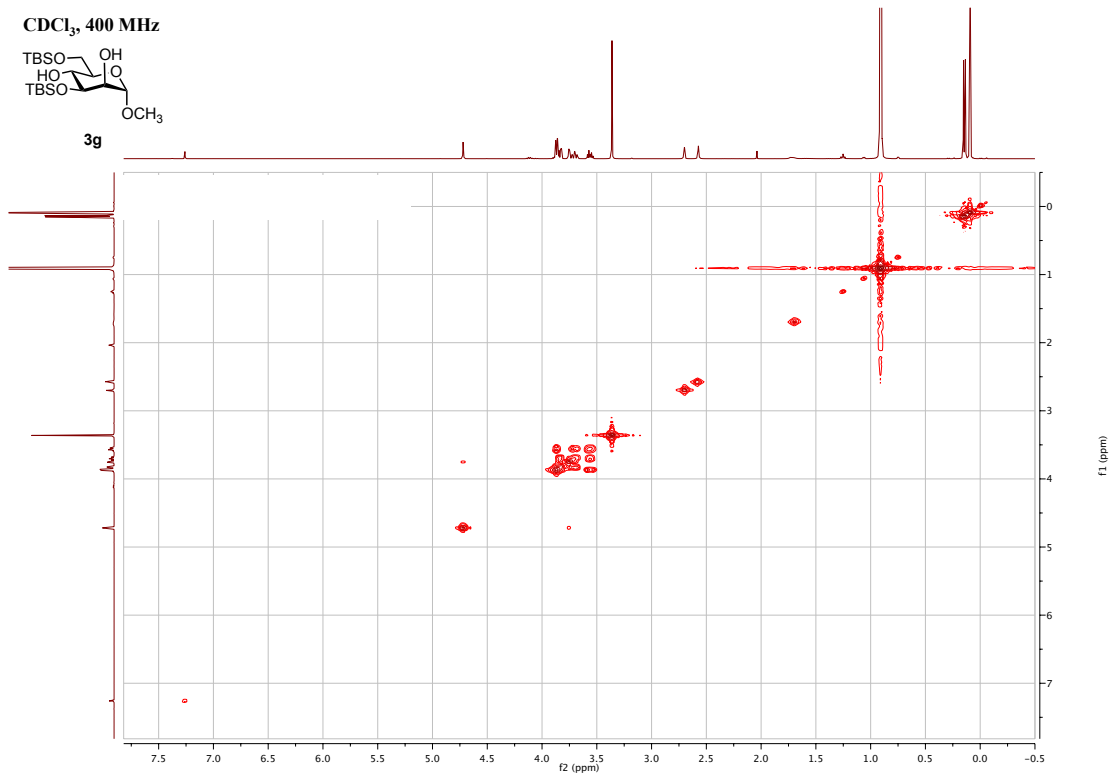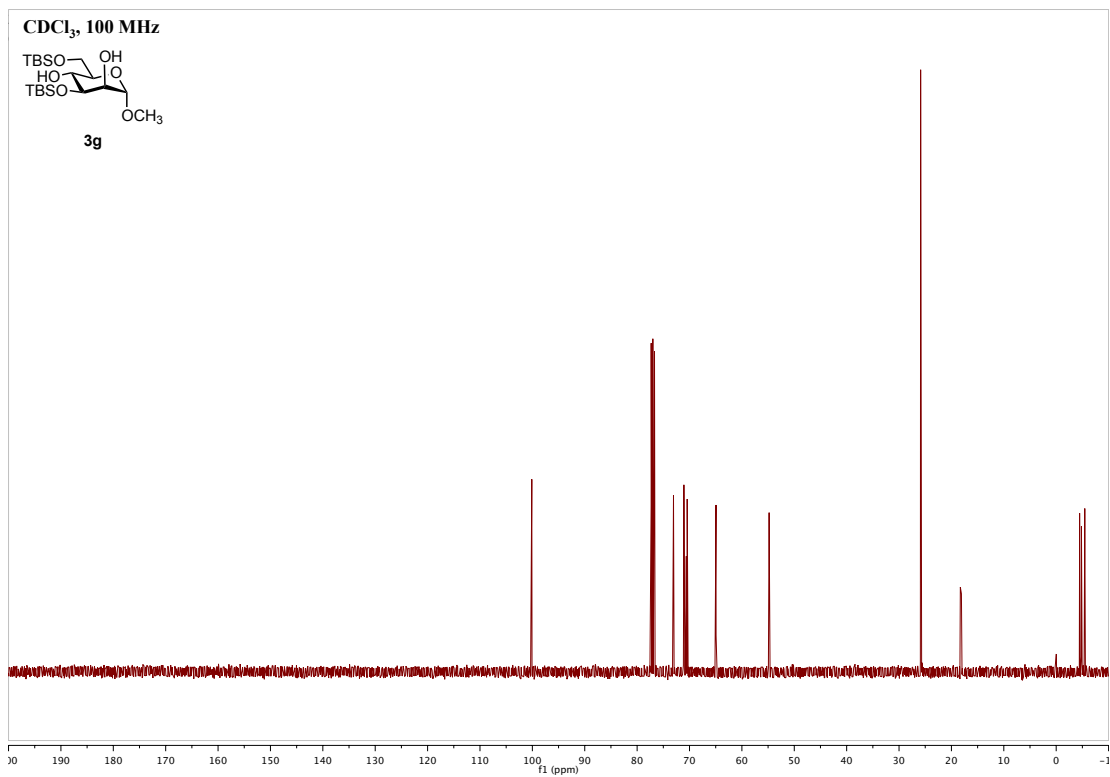

Supplement: c3ob40981c.pdf [file c3ob40981c.pdf]
